# Supplementary material for: Comparison of Dietary Intake Before vs After Taxes on Sugar-Sweetened Beverages and Nonessential Energy-Dense Foods in Mexico, 2012 to 2018
Source: PubMed Central journal article supplement (PMC10366703; doi:10.1001/jamanetworkopen.2023.25191), 2023-07-24

## Supplemental Online Content

Batis C, Castellanos-Gutiérrez A, Sánchez-Pimienta TG, et al. Comparison of dietary intake before vs after taxes on sugar-sweetened beverages and nonessential energy-dense foods in Mexico, 2012 to 2018. *JAMA Netw Open.* 2023;6(7):e2325191. doi:10.1001/jamanetworkopen.2023.25191

**eTable.** Contribution to Volume of Taxed and Untaxed Beverages and Contribution to Energy of Taxed and Untaxed Foods in 2012 (Pretax) and 2016 (Posttax) by Sociodemographic Characteristics According to 24-Hour Dietary Recalls

**eFigure 1.** Flowchart of Final Analytical Sample With 24-hr Dietary Recalls

**eFigure 2.** Flowchart of Final Analytical Sample With Food Frequency Questionnaires

This supplemental material has been provided by the authors to give readers additional information about their work.

**eTable. Contribution to Volume of Taxed and Untaxed Beverages and Contribution to Energy of Taxed and Untaxed Foods in 2012 (Pretax) and 2016 (Posttax) by Sociodemographic Characteristics According to 24-Hour Dietary Recalls<sup>1</sup>**

|                                                                   | 2012<br>Mean ± SE | 2016 vs 2012<br>β (95% CI) | 2012<br>Mean ± SE | 2016 vs 2012<br>β (95% CI) | 2012<br>Mean ± SE | 2016 vs 2012<br>β (95% CI) | 2012<br>Mean ± SE | 2016 vs 2012<br>β (95% CI) |
|-------------------------------------------------------------------|-------------------|----------------------------|-------------------|----------------------------|-------------------|----------------------------|-------------------|----------------------------|
|                                                                   | Children 1-4y     |                            | Children 5-11y    |                            | Adolescents       |                            | Adults            |                            |
| Sample size, n                                                    | 2,113             | 502                        | 2,753             | 1,095                      | 2,056             | 1,241                      | 3,174             | 21,296                     |
| Total Energy, kcal                                                | 1347.6 ± 21.7     | -142.1<br>(-230.5, -53.8)  | 1818.7 ± 24.9     | -146.7<br>(-236, -57.3)    | 2071 ± 30.7       | -59.8<br>(-159.4, 39.8)    | 1996.8 ± 27.6     | -52.9<br>(-150.7, 45)      |
| All beverages, ml                                                 | 897.8 ± 20.8      | 64.7<br>(-29.4, 158.8)     | 1111.9 ± 23.1     | 9.1<br>(-58.3, 76.4)       | 1425.6 ± 29.3     | 205.7<br>(114.1, 297.3)    | 1568.9 ± 27.1     | 146.9<br>(31.2, 262.6)     |
| Taxed beverages, % ml from beverages                              | 18.1 ± 0.8        | 1 (-1.9, 3.8)              | 21.4 ± 0.8        | -3.3 (-5.7, -1)            | 28.1 ± 1          | -6.6 (-10.1, -3)           | 20.1 ± 0.7        | -1.7 (-4.8, 1.3)           |
| Carbonated beverages, % ml from beverages                         | 5.8 ± 0.5         | 2 (-0.1, 4)                | 10.0 ± 0.6        | 1.1 (-1.1, 3.4)            | 18.3 ± 0.8        | -3.6 (-6.4, -0.9)          | 14.7 ± 0.6        | -0.2 (-3.1, 2.6)           |
| Non-carbonated beverages, % ml from beverages                     | 12.4 ± 0.7        | -1.1 (-3.7, 1.5)           | 11.4 ± 0.6        | -4.5 (-6.2, -2.7)          | 9.8 ± 0.8         | -3 (-5, -1)                | 5.4 ± 0.4         | -1.5 (-3, -0.1)            |
| All foods, kcal                                                   | 1019.7 ± 20.8     | -94<br>(-175.7, -12.4)     | 1511.9 ± 22.2     | -131.7<br>(-213.5, -50)    | 1719.7 ± 28.4     | -41.4<br>(-138.7, 55.9)    | 1627.8 ± 23.6     | -46.2<br>(-130.2, 37.7)    |
| Taxed foods, % kcal from foods                                    | 25.3 ± 0.8        | -6.7 (-9.6, -3.8)          | 23.1 ± 0.6        | -3 (-5.4, -0.6)            | 21.4 ± 0.7        | -4.3 (-6.6, -2)            | 14.2 ± 0.4        | -2.2 (-4, -0.4)            |
| Sweet bread from bakery, % kcal from foods                        | 7.8 ± 0.6         | -3.5 (-5.2, -1.9)          | 6.0 ± 0.4         | -1.1 (-2.6, 0.5)           | 5.7 ± 0.5         | 0.3 (-1.2, 1.7)            | 6.7 ± 0.4         | 0.9 (-1, 2.8)              |
| Packaged sweet bread and cookies <sup>2</sup> , % kcal from foods | 6.7 ± 0.5         | -0.1 (-2.2, 1.9)           | 6.5 ± 0.4         | -1.5 (-2.8, -0.2)          | 6.2 ± 0.4         | -2.1 (-3.3, -1.9)          | 3.8 ± 0.3         | -1.6 (-2.4, -0.7)          |
| Other taxed foods <sup>3</sup> , % kcal from foods                | 10.8 ± 0.5        | -3 (-4.8, -1.1)            | 10.6 ± 0.4        | -0.4 (-2, 1.1)             | 9.5 ± 0.5         | -2.5 (-4.2, -2.1)          | 3.7 ± 0.2         | -1.5 (-2.2, -0.9)          |
|                                                                   | Men               |                            | Women             |                            | Urban             |                            | Rural             |                            |
| Sample size, n                                                    | 4,899             | 1, 870                     | 5, 197            | 2, 264                     | 6, 312            | 1, 948                     | 3, 784            | 2, 186                     |
| Total Energy, kcal                                                | 2135.7 ± 29.6     | -32.7<br>(-132.4, 67.1)    | 1725.1 ± 21.1     | -110.4<br>(-192.6, -28.2)  | 1945.0 ± 22.7     | -92.6<br>(-174.2, -10.9)   | 1889.9 ± 31.7     | -46.5<br>(-135.6, 42.5)    |
| All beverages, ml                                                 | 1567.0 ± 29.7     | 203.3<br>(86.4, 320.2)     | 1290.6 ± 20.1     | 68.9<br>(-12.5, 150.4)     | 1472.7 ± 22.4     | 114.6<br>(23.2, 206.1)     | 1344.8 ± 32.4     | 152.6<br>(43.3, 261.9)     |
| Taxed beverages, % ml from beverages                              | 23.2 ± 0.7        | -1.4 (-4.1, 1.3)           | 19.4 ± 0.7        | -3.1 (-5.9, -0.3)          | 22.7 ± 0.6        | -2.8 (-5.6, 0)             | 19.4 ± 0.8        | -0.9 (-3.5, 1.7)           |
| Carbonated beverages, % ml from beverages                         | 16.1 ± 0.7        | -0.4 (-2.9, 2.1)           | 11.5 ± 0.5        | 0.1 (-2.4, 2.6)            | 14.6 ± 0.5        | -0.6 (-3.1, 1.9)           | 12.8 ± 0.7        | 0.8 (-1.5, 3.1)            |
| Non-carbonated beverages, % ml from beverages                     | 7.1 ± 0.5         | -1 (-2.6, 0.6)             | 7.9 ± 0.4         | -3.2 (-4.3, -2.1)          | 8.1 ± 0.4         | -2.2 (-3.6, -0.8)          | 6.6 ± 0.4         | -1.7 (-2.6, -0.8)          |
| All foods, kcal                                                   | 1733.6 ± 24.5     | -53.3<br>(-135.7, 29.1)    | 1418.2 ± 18.7     | -65.8<br>(-142.3, 10.6)    | 1573.6 ± 19.5     | -65.6<br>(-136.6, 5.5)     | 1568.7 ± 28.4     | -60.8<br>(-139.8, 18.1)    |
| Taxed foods, % kcal from foods                                    | 16.9 ± 0.5        | -2.1 (-3.6, -0.6)          | 18.1 ± 0.4        | -3.9 (-5.8, -1.9)          | 18.2 ± 0.4        | -3.4 (-5, -1.9)            | 15.9 ± 0.6        | -1.4 (-3, 0.3)             |
| Sweet bread from bakery, % kcal from foods                        | 6.5 ± 0.4         | 0.9 (-0.5, 2.3)            | 6.7 ± 0.4         | -0.6 (-2.6, 1.4)           | 6.4 ± 0.3         | 0.5 (-1.1, 2.2)            | 6.3 ± 0.5         | -0.2 (-1.6, 1.1)           |
| Packaged sweet bread and cookies <sup>2</sup> , % kcal from foods | 5.0 ± 0.3         | -1.6 (-2.5, -0.6)          | 4.6 ± 0.2         | -1.4 (-2.2, -0.6)          | 5.0 ± 0.2         | -1.9 (-2.6, -1.1)          | 4.3 ± 0.4         | -0.6 (-1.8, 0.5)           |
| Other taxed foods <sup>3</sup> , % kcal from foods                | 5.4 ± 0.3         | -1.4 (-2.1, -0.7)          | 6.7 ± 0.2         | -1.9 (-2.7, -1)            | 6.8 ± 0.2         | -2.1 (-2.8, -1.4)          | 5.4 ± 0.3         | -0.5 (-1.1, 0.1)           |
|                                                                   | SES1              |                            | SES2              |                            | SES3              |                            |                   |                            |
| Sample size, n                                                    | 3,679             | 1, 429                     | 3, 544            | 1, 491                     | 2,843             | 1, 214                     |                   |                            |
| Total Energy, kcal                                                | 1900.2 ± 39.2     | -70.4<br>(-162.3, 21.6)    | 1936.2 ± 29.2     | -72.8<br>(-176.4, 30.8)    | 1908.9 ± 33.2     | -81.6<br>(-196.6, 33.5)    |                   |                            |
| All beverages, ml                                                 | 1350.9 ± 45.1     | 169.6<br>(25.4, 313.7)     | 1380.9 ± 31.3     | 159.7<br>(42.5, 276.8)     | 1455.3 ± 35.1     | 67.4<br>(-66.6, 201.5)     |                   |                            |
| Taxed beverages, % ml from beverages                              | 20.5 ± 1          | -1.3 (-3.6, 1)             | 22.7 ± 0.9        | -3.7 (-6.6, -0.9)          | 21.9 ± 1.1        | -2.1 (-6.3, 2.2)           |                   |                            |
| Carbonated beverages, % ml from beverages                         | 13.1 ± 0.8        | -0.1 (-2.3, 2.2)           | 15.2 ± 0.7        | -1.3 (-4, 1.3)             | 13.9 ± 1          | 0.3 (-3.8, 4.4)            |                   |                            |

|                                                                   |               |                         |               |                         |               |                         |
|-------------------------------------------------------------------|---------------|-------------------------|---------------|-------------------------|---------------|-------------------------|
| Non-carbonated beverages, % ml from beverages                     | 7.5 ± 0.6     | -1.3 (-2.7, 0.2)        | 7.5 ± 0.5     | -2.4 (-3.7, -1.1)       | 8.0 ± 0.6     | -2.4 (-4.5, -0.3)       |
| All foods, kcal                                                   | 1568.1 ± 33.7 | -101.3<br>(-174.5, -28) | 1582.8 ± 24.6 | -61.2<br>(-152.2, 29.7) | 1537.1 ± 31.6 | -31.4<br>(-147.3, 84.6) |
| Taxed foods, % kcal from foods                                    | 16.3 ± 0.9    | -4 (-5.5, -2.4)         | 18.4 ± 0.6    | -2.8 (-4.8, -0.8)       | 17.8 ± 0.7    | -1.7 (-4.4, 0.9)        |
| Sweet bread from bakery, % kcal from foods                        | 7.5 ± 1       | -2.1 (-3.3, -0.9)       | 7.5 ± 0.4     | -0.1 (-1.6, 1.4)        | 5.2 ± 0.7     | 2.6 (-0.3, 5.5)         |
| Packaged sweet bread and cookies <sup>2</sup> , % kcal from foods | 4.1 ± 0.4     | -0.9 (-1.8, 0.1)        | 4.5 ± 0.3     | -1.1 (-2.3, 0.1)        | 5.5 ± 0.4     | -2.2 (-3.3, -1.1)       |
| Other taxed foods <sup>3</sup> , % kcal from foods                | 4.7 ± 0.4     | -1 (-1.6, -0.4)         | 6.4 ± 0.3     | -1.6 (-2.6, -0.6)       | 7.1 ± 0.4     | -2.1 (-3.2, -1.1)       |

<sup>1</sup>Adjusted by log-transformed state-level GDP, state-level unemployment rate, education level of adults aged ≥20y and education level of the head of the household for participants under 20y of age, and all other sociodemographic characteristics in the table when not stratified by it.

<sup>2</sup>Includes packaged sweet bread and cookies, cereal bars, and pastries

<sup>3</sup>Includes salty snacks, ready-to-eat cereals, chocolate, candies, ice cream, sorbets, spreads, jellies.

**eFigure 1. Flowchart of Final Analytical Sample With 24-hr Dietary Recalls**

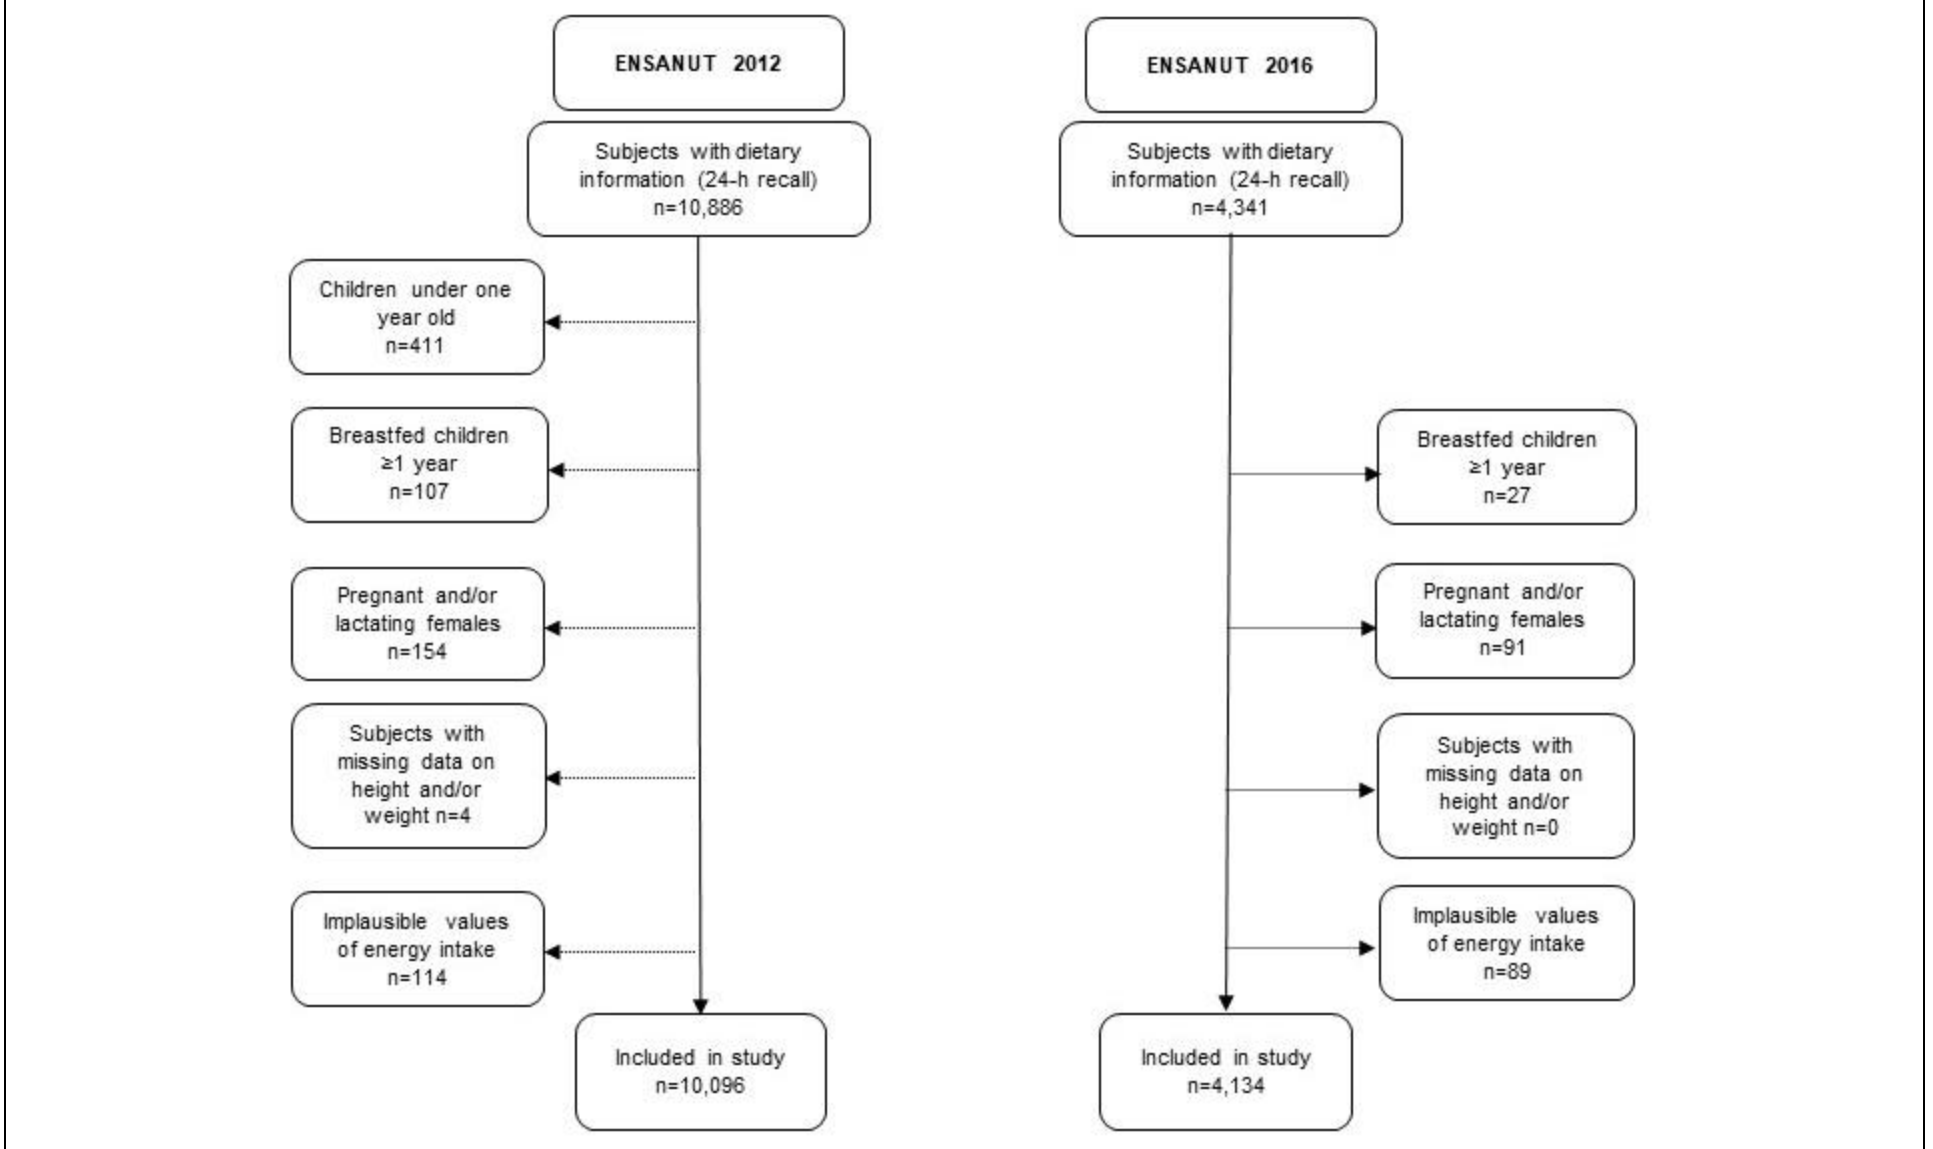

**eFigure 2. Flowchart of Final Analytical Sample With Food Frequency Questionnaires**

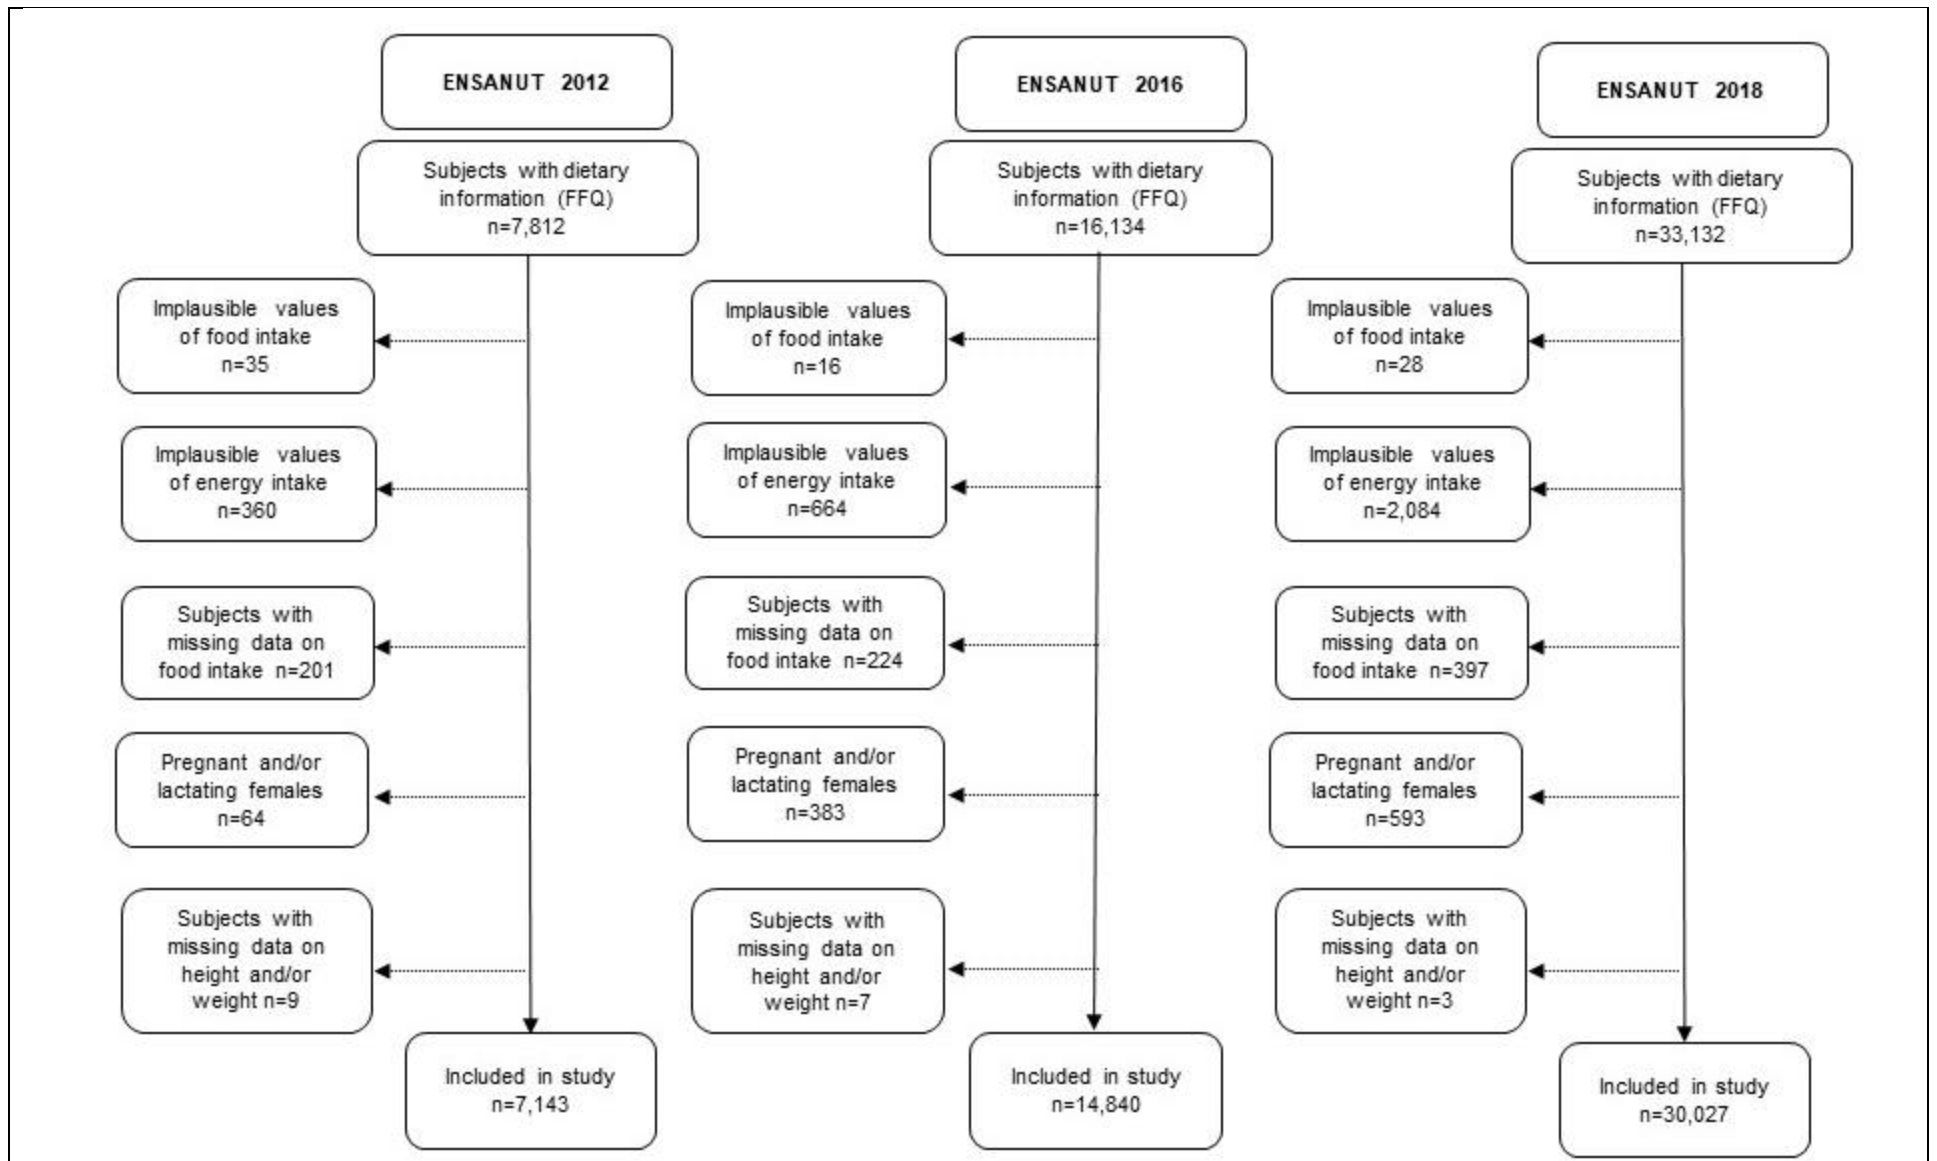

Supplement: jamanetwopen-e2325191-s001.pdf [file jamanetwopen-e2325191-s001.pdf]
