# Supplementary material for: Comparison of Dietary Intake Before vs After Taxes on Sugar-Sweetened Beverages and Nonessential Energy-Dense Foods in Mexico, 2012 to 2018
Source: PubMed Central journal article supplement (PMC10366703; doi:10.1001/jamanetworkopen.2023.25191), 2023-07-24
Supplement: jamanetwopen-e2325191-s002.pdf [file jamanetwopen-e2325191-s002.pdf]

## Data Sharing Statement

Batis. Comparison of Dietary Intake Before vs After Taxes on Sugar-Sweetened Beverages and Nonessential Energy-Dense Foods in Mexico, 2012 to 2018. *JAMA Netw Open*. Published July 24, 2023. doi:10.1001/jamanetworkopen.2023.25191

### Data

**Data available:** Yes

**Data types:** Deidentified participant data, Data dictionary

**How to access data:** <https://ensanut.insp.mx/>

**When available:** beginning date: 11-01-2020

### Supporting Documents

**Document types:** None

### Additional Information

**Who can access the data:** data is publicly available

**Types of analyses:** data is publicly available for any purpose

**Mechanisms of data availability:** data is publicly available without any requirement
